1                   **Genetic determinants of penicillin tolerance in**

2                                           ***Vibrio cholerae***

3

4 Anna I. Weaver<sup>\*1,2</sup>, Shannon G. Murphy<sup>\*1,2</sup>, Benjamin Umans<sup>3</sup>, Srikar

5 Tallavajhala<sup>2</sup>, Ikenna Onyekwere<sup>1,2</sup>, Stephen Wittels<sup>3</sup>, Jung-Ho Shin<sup>1,2</sup>, Michael

6 VanNieuwenhze<sup>4</sup>, Matthew K. Waldor<sup>3</sup> and Tobias Dörr<sup>1,2#</sup>

7

8

9

10 **\*contributed equally**

11

12 <sup>1</sup> Department of Microbiology and <sup>2</sup> Weill Institute for Cell and Molecular Biology, Cornell  
13 University, Ithaca, NY 14853

14 <sup>3</sup> Howard Hughes Medical Institute and Brigham and Women's Hospital/Harvard Medical School,  
15 Boston, MA 02115

16 <sup>4</sup> Department of Molecular and Cellular Biochemistry and Department of Biology, Indiana  
17 University, Bloomington, IN 47405-7003

18

19 #correspondence: [tdoerr@cornell.edu](mailto:tdoerr@cornell.edu)

## 20 **Abstract**

21 Many bacteria are resistant to killing (“tolerant”) by typically bactericidal  
22 antibiotics due to their ability to counteract drug-induced cell damage. *Vibrio*  
23 *cholerae*, the cholera agent, displays an unusually high tolerance to diverse  
24 inhibitors of cell wall synthesis. Exposure to these agents, which in other bacteria  
25 leads to lysis and death, results in a breakdown of the cell wall and subsequent  
26 sphere formation in *V. cholerae*. Spheres readily recover to rod-shaped cells  
27 upon antibiotic removal, but the mechanisms mediating the recovery process are  
28 not well-characterized. Here, we found that the mechanisms of recovery are  
29 dependent on environmental conditions. Interestingly, on agarose pads, spheres  
30 undergo characteristic stages during the restoration of rod shape. Drug inhibition  
31 and microscopy experiments suggest that class A Penicillin Binding Proteins  
32 (aPBPs) play a more active role than the Rod system, especially early in sphere  
33 recovery. TnSeq analyses revealed that LPS and cell wall biogenesis genes as  
34 well as the sigma E cell envelope stress response were particularly critical for  
35 recovery. LPS core and O-antigen appear to be more critical for sphere  
36 formation/integrity and viability than Lipid A modifications. Overall, our findings  
37 demonstrate that the outer membrane is a key contributor to beta lactam  
38 tolerance and suggest a role for aPBPs in cell wall biogenesis in the absence of  
39 rod-shape cues. Factors required for post-antibiotic recovery could serve as  
40 targets for antibiotic adjuvants that enhance the efficacy of antibiotics that inhibit  
41 cell wall biogenesis.

42

43

## 44 **Introduction**

45 The emergence of antibiotic resistance in bacterial pathogens requires the  
46 development of new drugs and novel strategies to combat infection. However,  
47 antibiotic resistance is not the sole explanation for antibiotic treatment failures.  
48 Instead, some infections are caused by fully susceptible pathogens that are  
49 thought to survive antibiotic treatment due to a high level of drug tolerance, i.e.,  
50 the capacity to stay alive in the presence of otherwise bactericidal drugs (1-4).  
51 Dormant persister cells, which resist killing by all available antibiotics (4),  
52 represent an extreme form of antibiotic tolerance. However, susceptible (non-  
53 persister) bacteria are sometimes capable of surviving severe antibiotic-imposed  
54 damage, potentially providing an opportunity to acquire or evolve resistance  
55 mechanisms. In addition, surviving bacteria typically exhibit a prolonged lag  
56 phase after drug exposure (the post-antibiotic effect), during which they can  
57 repair antibiotic induced damage. Currently our knowledge of the molecular  
58 processes underlying antibiotic tolerance and the post-antibiotic effect is limited.  
59 Understanding the mechanistic underpinnings of post-antibiotic recovery could  
60 yield insights enabling the development of novel approaches to target tolerant  
61 organisms.

62 We and others have previously shown that some Gram-negative bacteria,  
63 including *Burkholderia pseudomallei*, *Pseudomonas aeruginosa* and *Vibrio*  
64 *cholerae*, the causative agent of cholera, exhibit high tolerance to ordinarily  
65 bactericidal cell wall acting antibiotics (e.g. beta lactams) (5-7). In *V. cholerae*, for

66 example, exposure to beta lactam antibiotics at multiples of the minimum  
67 inhibitory concentration (MIC) results in cell wall loss, similar to well-studied  
68 model organisms, such as *E. coli* (5). However, in contrast to *E. coli*, *V. cholerae*  
69 survives as wall-deficient spheres, similar to L-forms (8), with the notable  
70 difference that *V. cholerae* spheres do not divide while in this wall-less state.  
71 Remarkably, however, the wall-deficient spherical cells remain viable and have  
72 minimal plating defects on media lacking antibiotics (5). Sphere survival *in vivo*  
73 (in the mouse intestine) and *in vitro* is enabled by the two-component cell wall  
74 stress response system *wigKR* (aka *vxrAB*), which controls several processes  
75 including cell wall (peptidoglycan, PG) biosynthesis, motility, type VI secretion  
76 and biofilm formation (9-11).

77         The many steps in PG synthesis include cytoplasmic production of the  
78 lipid II precursor, translocation of this precursor into the periplasm, and finally  
79 precursor incorporation into the cell wall sacculus via polymerization  
80 (transglycosylation, TG) and intercrosslinking (transpeptidation, TP) reactions.  
81 TG and TP reactions are mediated by two spatiotemporally distinct entities, the  
82 Rod system (with RodA as the polymerase and a class B Penicillin Binding  
83 Protein [bPBP] as the crosslinking enzyme) and the class A PBPs (aPBPs) that  
84 can catalyze both TG and TP reactions (12). In addition, aPBPs require outer-  
85 membrane localized lipoproteins (Lpos) for their activity (13, 14) and the Rod  
86 system is associated with (and requires for its activity) the cytoskeletal actin  
87 homolog MreB (15-18). Almost the entire *V. cholerae* PG synthesis pathway is

88 upregulated through *wigKR/vxrAB* in response to antibiotics that disrupt cell wall  
89 synthesis (9), with the notable exception of components of the Rod system.

90 We have little knowledge of how *V. cholerae* cell envelope biogenesis  
91 pathways enable recovery from the antibiotic-induced spherical state and if  
92 additional factors contribute to survival and recovery from this state. Here, we  
93 have characterized the post-antibiotic recovery process in *V. cholerae*.  
94 Microscopy using fluorescent protein fusions and cell wall stains revealed that  
95 during an ordered sphere recovery process, aPBP1a localizes prominently to the  
96 outgrowth area and its function appears to account for the majority of the initial  
97 deposition of new cell wall material. In contrast, the Rod system, which is  
98 ultimately required for sphere recovery, plays a minor role in the initial recovery  
99 stages. We also used transposon insertion sequencing (TnSeq) to identify the  
100 genetic requirements for *V. cholerae* tolerance to penicillin and found that there is  
101 an enrichment in genes important for cell wall and outer membrane biogenesis  
102 functions among mutations that confer post-antibiotic fitness defects. Collectively,  
103 our findings reveal the pleiotropic nature of beta lactam tolerance, provide  
104 potential targets for beta lactam adjuvants, and have implications for the role of  
105 aPBPs in *de novo* PG template generation.

106

## 107 **Results**

### 108 **Distinct mechanisms of recovery in different growth conditions**

109 In previous work, we used microscopy to characterize *V. cholerae* sphere  
110 formation following exposure to antibiotics that interfere with cell wall synthesis

111 (5). Here we used a similar approach to investigate how spheres revert to rod  
112 shape. As observed previously, *V. cholerae* cells grown in minimal medium  
113 exposed to penicillin G form non-dividing spheres exhibiting well-defined  
114 demarcations between the phase-dark cytoplasm, an enlarged periplasmic space  
115 visible as a phase-light bubble, and a clearly visible outer membrane (**Fig. 1A**).  
116 Timelapse light microscopy was used to monitor cell morphology on agarose  
117 pads after removal of the antibiotic by washing. In these conditions,  
118 approximately 10 to 50% of cells fully recovered to form microcolonies (see  
119 **Movie S1** for an example). While these conditions were not as favorable for  
120 recovery as plating on LB agar (5), they enabled us to discern steps in sphere  
121 recovery, which appeared to take place in partially overlapping stages in wild  
122 type (wt) cells (**Fig. 1B**). Initially, phase dark material engulfed the periplasmic  
123 space (engulfment stage); then, the now elliptical-shaped cells reduced their  
124 widths (constriction phase) followed by elongation (elongation phase); finally  
125 these elongated cell masses gave rise to rod-shaped cells, which proliferated into  
126 a microcolony.

127 The pattern of recovery of rod shape described above is distinct from that  
128 described for osmostabilized, beta lactam treated *E. coli* cells (19); however the  
129 latter experiments were conducted in microfluidic chambers rather than agarose  
130 pads. Unlike *E. coli*, *V. cholerae* does not require osmostabilization for sphere  
131 formation; furthermore, *V. cholerae* spheres retain viability and structural integrity  
132 in LB and minimal medium, as well as in rabbit cecal fluid (5). Unlike the  
133 conditions in microfluidic chambers, agarose pads may provide external

134 structural support to recovering spheres. Consistent with this idea, we found that  
135 the pattern and dynamics of recovery were very different when we repeated  
136 recovery experiments in liquid M9 minimal medium. Following exposure to penG  
137 and washing, cells were intermittently removed from the liquid medium and  
138 imaged. We did not observe the distinct stages of recovery observed on agarose  
139 pads; in general, sphere morphology did not change for the duration of the  
140 experiment (12 h), except for a slight increase in volume (**Fig. 2**). However,  
141 normal, rod-shaped cells appeared after ~ 4-5 hours of post-antibiotic incubation  
142 (**Fig. 2**, yellow arrow). We surveyed ~ 100 cells per time point in each of two  
143 biological replicate experiments and did not find any intermediates, suggesting  
144 that if such intermediates form, they do so at a frequency  $<1/100$ . The origin of  
145 the rod-shaped cells is not clear, but they may have directly budded off of  
146 spheres from a newly-formed pole juxtaposed to the periplasm, similar to the  
147 recovery protrusions observed in *E. coli* after treatment with beta lactams (19) or  
148 lysozyme (20). Indeed, we observed some rods that appeared to be budding off  
149 of spheres (**Fig. 2**, red arrow). Thus, the morphological transitions and dynamics  
150 of sphere to rod conversion are dependent on specific culture conditions and  
151 may rely on distinct mechanisms.

152

### 153 **PBP localization dynamics during sphere recovery**

154 *V. cholerae*, like the model rod-shaped organisms *E. coli* and *B. subtilis*, encodes  
155 two distinct cell wall synthesis machineries, namely the RodAZ-MreBC-PBP2  
156 elongation complex (Rod system) and the aPBPs (15, 21, 22). Nearly the entire

157 cell wall synthesis pathway, including aPBPs, is upregulated by the *wigKR* cell  
158 wall stress response two component system. Members of the Rod system,  
159 however, are conspicuously absent from the *wigKR* regulon (9). We thus  
160 hypothesized that aPBPs were crucial determinants of post-antibiotic recovery.  
161 To investigate the role of PBP1a, *V. cholerae*'s primary aPBP (23) in the  
162 recovery process, we created a functional (**Fig. S1**) PBP1amCherry translational  
163 fluorescent protein and tracked its localization in recovering spheres on agarose  
164 pads. In the first stages of recovery, PBP1amCherry was diffuse, but then it  
165 assumed a striking, band-like pattern along the leading edge of the periplasmic  
166 engulfment, migrating ahead of the phase-dark cytoplasmic material (**Fig. 3,**  
167 **yellow arrow**). Inhibiting PBP1a's TG activity using moenomycin ( $10 \mu\text{g ml}^{-1}$ , 10x  
168 MIC), arrested sphere recovery in the pre-engulfment stage and prevented  
169 proper PBP1a localization, suggesting that the recovery process depends on  
170 PBP1a's PG synthesis capabilities (or at least transglycosylation function). We  
171 also tested whether MreB was necessary for PBP1a's leading edge localization  
172 by treating the recovering PBP1amcherry strain with the MreB inhibitor MP265  
173 (24) ( $200 \mu\text{M}$ , 10 x MIC). Inhibition of MreB suppressed recovery and completion  
174 of periplasmic engulfment, establishing that MreB is important for sphere to rod  
175 recovery as shown before for *E. coli* (19). However, engulfment was only partially  
176 defective in spheres treated with MP265 and PBP1a still localized in a  
177 concentrated, band-like pattern in the presence of MP265 (**Fig. 3, green arrow**).  
178 Thus, while both MreB and PBP1a are important for recovery, aPBPs seems to  
179 function earlier than the Rod system in the process.



180

181 **The aPBPs are important for the initiation of cell wall synthesis early in**  
182 **sphere recovery**

183 Since PBP1a was concentrated around the leading edge during the engulfment  
184 process, we hypothesized that the aPBPs might be required for the  
185 commencement of cell wall synthesis after antibiotic-induced murein degradation.  
186 To test this, we treated cells with PenG, removed the antibiotic by washing, and  
187 then used the fluorescent D-amino acid HADA to visualize insertion of new cell  
188 wall material. An  $\Delta ldtA \Delta ldtB$  mutant defective in L,D transpeptidase activity (25)  
189 was used in these experiments to exclude PG synthesis-independent HADA  
190 incorporation. In untreated spheres, cell wall deposition generally started at the  
191 opposite side of the periplasm (**Fig. 4**). This is likely the place where aPBPs and  
192 their OM activators interact first, as the inner and outer membranes are in close  
193 proximity in this area. In the presence of the MreB inhibitor MP265 (at 10 x MIC),  
194 initial cell wall deposition was reduced compared to untreated spheres, but  
195 remained detectable. In contrast, when cells were incubated with moenomycin  
196 (10 x MIC), incorporation of HADA-labeled material was drastically reduced (**Fig.**  
197 **4**, see **Fig. S2** for image adjusted to lower dynamic range). It follows that while  
198 both the aPBPs and MreB are required for sphere recovery, the aPBPs are more  
199 active than the Rod system in producing nascent PG in recovering spheres.

200

201 **Identification of genes required for post-antibiotic recovery**

202 We used transposon insertion site sequencing (TIS, aka TnSeq) to identify  
203 factors required for sphere recovery. Since we observed differences in recovery  
204 dynamics on solid (agarose pad) versus in liquid media, we combined both  
205 conditions in TIS experiments to uncover a broad array of recovery factors. Cells  
206 were exposed to PenG in liquid culture for 4 hr, washed, outgrown overnight in  
207 the absence of antibiotics, and then plated. The insertion sites in the Tn library  
208 were sequenced before addition of the antibiotic (PRE), after incubation in PenG  
209 (POST), and after the overnight outgrowth followed by plating (OG). Strikingly,  
210 comparison of the insertion profiles in the PRE and POST conditions (**Fig. 5A**)  
211 did not reveal any genes that met stringent criteria for differential fitness ( $>10$ -  
212 fold difference in insertion abundance,  $p\text{-val} < 0.01$ ). Thus, no single mutation  
213 appears to lead to catastrophic lysis in *V. cholerae* treated with penicillin G. In  
214 contrast, comparing the insertion profiles in the POST vs OG conditions revealed  
215 55 genes which had reduced fitness during post-antibiotic outgrowth ( $>10$ -fold  
216 fewer insertions along with  $p\text{-val} < 0.01$ ).

217 Notably, there was an enrichment of several functional pathways among  
218 the 55 genes required for robust post-antibiotic outgrowth (**Fig. 5B**). Included  
219 among the enriched categories were genes predicted to be required for cell wall  
220 synthesis and recycling (*pbp1A*, *vc2153*, *ampG*, *pbp5*, *lpoB*, *mltA*),  
221 lipopolysaccharide (LPS) biosynthesis (core biosynthesis, Lipid A acylation and  
222 O-antigen synthesis pathways, *vc0212*, *vc0223*, *vc0225*, *vc0236*, *vc0237*,  
223 *vc0240*), intrinsic stress resistance (superoxide dismutase, *rpoE*), phosphate  
224 uptake (*vc0724-0726*) and chromosome dynamics (*mukBEF*) (**Fig. S3**).

225 Intriguingly, some of the hits (*vc2153*, *rpoE*, PG synthesis factors) were  
226 homologs or analogs of factors identified in a recent TnSeq screen for genes that  
227 promote tolerance to beta lactams in *Burkholderia pseudomallei* and *B.*  
228 *thailandensis* (6), raising the possibility that there are shared tolerance  
229 requirements across Gram-negative bacteria.

230 We were particularly interested in the contribution of cell envelope  
231 functions to sphere recovery and therefore prioritized genes involved in LPS and  
232 cell wall metabolism for further studies. We first focused on the 6 LPS  
233 biosynthesis genes that answered our screen. To validate the requirement of  
234 LPS core biosynthesis in the recovery process, we created an insertion mutant in  
235 *vc0225*, the gene encoding heptosyltransferase I. This mutation is expected to  
236 result in a truncated LPS molecule lacking an outer core and O-antigen and  
237 consistent with this, the mutant strain did not have detectable high molecular  
238 weight LPS in isolated outer membrane (OM) material (**Fig. S4**). Wild type (wt)  
239 and *vc0225::kan* mutant cells were compared in time-dependent viability  
240 experiments. Exposing wt cells to penicillin G (at 10 x MIC) in minimal medium  
241 (unlike LB) in some experiments permitted initial growth (**Fig. 6A**). We do not  
242 know the reason for this initial growth (*V. cholerae* does not become resistant to  
243 PenG in M9, as evidenced by sphere formation (**Fig. 6B**), but it is possible that  
244 antibiotic diffusion through the OM is slower in minimal than in rich medium.  
245 Disruption of the LPS core gene *vc0225* resulted in the absence of initial growth  
246 and a subsequent 100-fold plating defect after exposure to PenG (**Fig. 6A**),  
247 corroborating the TnSeq result. This survival defect could be complemented by

248 expressing *vc0225* from a neutral chromosomal locus. Light microscopy revealed  
249 that the *vc0225* mutant strain still formed spheres (**Fig. 6B**); however, these  
250 spheres were morphologically distinct from wt spheres. In contrast to wt  
251 spheres, which were usually seen as single cells, exhibiting well-demarcated  
252 separation between the phase dark cytoplasm and the phase light periplasm  
253 (**Fig. 1A**), *vc0225* mutant cells were mostly grape-like masses showing a  
254 checkered pattern of distinct periplasmic enclaves in a sometimes divided  
255 cytoplasm (**Fig. 6B**). Visualizing an inner membrane marker (PBP1amCherry)  
256 also revealed the lack of a clear distinction between the inner and outer  
257 membrane in the mutant. Upon removal of the antibiotic, *vc0225* spheres were  
258 defective in all stages of the recovery process; the spheres underwent modest  
259 enlargement without initiating periplasmic engulfment (**Fig. 6C**). Thus, intact LPS  
260 appears necessary for sphere anatomy and internal organization; moreover,  
261 these LPS-associated sphere defects seem to impair sphere recovery.

262

### 263 **Sphere integrity does not depend on Lipid A modifications**

264 The outer membrane appears to be the principle load-bearing structure in beta  
265 lactam-induced spheres, because these cells are largely devoid of detectable cell  
266 wall material and are more susceptible to detergents and antimicrobial peptides  
267 (5, 7). *V. cholerae* LPS contains at least two modifications which are not found in  
268 *E. coli* LPS and that could potentially stabilize *V. cholerae* spheres. These  
269 modifications, addition of phosphoethanolamine to the 1-phosphate group of lipid  
270 A and an unusual glycine addition to a hydroxylauryl chain at the 2' position of

271 Lipid A, both promote resistance to polymyxin (26, 27); glycylation (by the *alm*  
272 system) is dominant, but the pH-dependent EptA can promote residual polymyxin  
273 resistance when the *alm* system is inactivated (22). We investigated whether  
274 these modifications were required for sphere formation and integrity by deleting  
275 the *alm* operon, which encodes the glycine transferase activity, and *eptA*, which  
276 encodes the ethanolamine transferase. As expected, the *alm* mutation abrogated  
277 polymyxin resistance on LB (**Fig. S5**). When these mutants, either alone (not  
278 shown) or in combination, were exposed to PenG they formed spheres that were  
279 indistinguishable from wt spheres (**Fig. 7A**), indicating that these Lipid A  
280 modifications are not required for sphere generation. The  $\Delta alm \Delta eptA$  mutations  
281 were then combined with disruptions in *vc0225* or *vc0212* (encoding the 3-  
282 hydroxy laurate transferase LpxN (28)) to test the effect of a core mutation  
283 (*vc0225*) or Lipid A under-acylation (*vc0212*) on sphere formation in LPS lacking  
284 glycine and ethanolamine modifications. (Note that mutation of *lpxN* results in the  
285 absence of the acyl chain modified by glycine and thus causes polymyxin B  
286 sensitivity, **Fig. S5**). The  $\Delta alm \Delta eptA vc0212::kan$  mutant still formed spheres  
287 after PenG exposure (**Fig. 7A**) but these spheres had ~5-fold decrease in  
288 viability compared to the wt (**Fig. 7B**). The  $\Delta alm \Delta eptA vc0225::kan$  mutant also  
289 formed spheres, but resulted in a more dramatic reduction in viability compared  
290 to the  $\Delta alm \Delta eptA vc0212::kan$  mutant (**Fig. 7B**) and to the single *vc0225::kan*  
291 mutant, where there was less pronounced loss of viability after 3 h (compare  
292 with **Fig. 6A**). Thus, LPS core and O-antigen appear to be more critical for  
293 sphere formation/integrity and viability than Lipid A modifications. However,

294 glycylation and/or ethanolamine addition to Lipid A appear to promote  
295 maintenance of sphere integrity in the absence of LPS core and O-antigen,  
296 suggesting that these modifications contribute to OM stability in this context.

297

298 **The sigma E cell envelope stress response is required for penicillin**  
299 **tolerance**

300 The TnSeq analysis implicated several genes in the sigma E cell  
301 envelope stress response as important for sphere viability/recovery (**Fig. S3**).  
302 Misfolding of outer membrane proteins such as OmpU triggers the *V. cholerae*  
303 envelope stress response, wherein sigma E directs the transcription of a set of  
304 genes involved in variety of cell envelope maintenance functions (29, 30). We  
305 found that the abundance of RpoE markedly increased several hours after cells  
306 were exposed to diverse antibiotics that interrupt cell wall synthesis (PenG,  
307 phosphomycin or D-cycloserine), consistent with the idea that this sigma factor  
308 promotes sphere survival (**Fig. 8A**). Interestingly, PenG treatment increased  
309 RpoE abundance independent of OmpU (**Fig. 8B**). The importance of sigma E  
310 for survival after PenG exposure was established by measuring time-dependent  
311 viability after antibiotic challenge. Since *rpoE* is essential, we used an  
312  $\Delta rpoE\Delta ompU$  strain (the latter deletion enables *rpoE* deletion (30)), to investigate  
313 *rpoE*'s importance for sphere viability/recovery. Following exposure to PenG, the  
314  $\Delta rpoE\Delta ompU$  strain exhibited a drastic (~1000-fold) plating defect compared to  
315 the wild type and  $\Delta ompU$  controls (**Fig. 8B**). Thus, sigma E (and presumably the  
316 regulon it controls) is a crucial determinant of *V. cholerae* beta lactam tolerance.

317           The importance of the sigma E response for beta lactam tolerance  
318 indicated the strong possibility that PenG-treated *V. cholerae* sustain OM  
319 damage; this in turn suggested that beta lactam exposure might sensitize cells to  
320 high molecular weight (HMW) antibiotics that are typically too large to permeate  
321 the Gram-negative cell envelope; e.g. vancomycin and ramoplanin. To test this,  
322 we plated cells exposed to PenG or a vehicle control on either LB or plates  
323 containing vancomycin (100  $\mu\text{g ml}^{-1}$ ) or ramoplanin (100  $\mu\text{g ml}^{-1}$  and 500  $\mu\text{g ml}^{-1}$ )  
324 (**Fig. 8C**). While untreated cultures plated at close to 100% on any of these  
325 plates, pre-treatment with PenG for 3h resulted in a 10- to 50-fold plating defect  
326 on either HMW antibiotic. Thus, while *V. cholerae* is tolerant to beta lactam  
327 antibiotics, these agents appear to sensitize it against HMW antibiotics.

328

## 329 **Discussion**

330 Antibiotic tolerance, the ability to survive and fully recover from exposure to  
331 normally lethal doses of bactericidal antibiotics, is a common cause of treatment  
332 failure and serves as a stepping-stone for the development of antibiotic  
333 resistance (31). The mechanism(s) of antibiotic tolerance and a related  
334 phenomenon, the post-antibiotic effect (the recovery process of tolerant cells) are  
335 understudied and insufficiently understood.

336           Here, we investigated the post-antibiotic effect in *V. cholerae*, an organism  
337 highly tolerant to typically bactericidal inhibitors of cell wall synthesis. Following  
338 beta lactam treatment, this pathogen forms viable cell wall deficient spheres that  
339 can re-establish their characteristic rod morphology when antibiotics are no

340 longer present. We found that the process of restoration of rod shape appears to  
341 be media dependent and to differ from that described for the recovery of *E. coli*  
342 spheres induced by cefsulodin (19). At least on agarose pads, 3 successive  
343 steps characterized the recovery process. Recovery involves re-localization of  
344 PBP1a to the leading edge of a periplasmic engulfment process and aPBPs,  
345 rather than the Rod system, have a primary role, particularly in the early steps of  
346 recovery. The characteristic steps and protein localization patterns involved in  
347 restoration of rod shape suggests that *V. cholerae*'s ability to recover from a well-  
348 less spherical state may be a previously unappreciated type of programmed  
349 response to stress. Furthermore, the capacity of wall-less spheres to remain  
350 viable and to regain rod shape in a step-wise fashion is not restricted to *V.*  
351 *cholerae*, but found in several other Gram-negative organisms (7, 20, 32).

352 Not surprisingly, TnSeq analysis revealed that genes required for  
353 peptidoglycan biogenesis were essential for sphere recovery; however, additional  
354 envelope-related functions, particularly LPS biosynthesis, and the RpoE  
355 envelope stress response system were also critical for *V. cholerae* spheres to  
356 recover from beta lactam assault. While this TnSeq dataset offers many  
357 intriguing leads for future studies of the post-antibiotic recovery process (e.g. the  
358 role of riboflavin and condensins), here we primarily focused on the role of LPS  
359 and PG biosynthesis in role.

360 Mutations in LPS core and O-antigen biosynthesis can have at least two  
361 potentially detrimental consequences for sphere viability/recovery. First,  
362 truncated (rough) LPS has been shown to result in increased OM permeability



363 due to the surface presentation of phospholipid bilayer patches resulting from  
364 LPS instability (33). Second, truncated LPS, which cannot be ligated to O-  
365 antigen, results in the accumulation of dead-end intermediates of O-antigen  
366 fused to the lipid carrier molecule undecaprenol (UNDP) (34). UNDP  
367 concentrations are limited and this carrier is critical for the biosynthesis of a  
368 variety of extracellular macromolecules, including peptidoglycan. Thus, in  
369 addition to direct effects on OM integrity, LPS core mutations can also impede  
370 efficient cell wall synthesis due to the reduced availability of UNDP; the  
371 consequences of such inhibition may be particularly severe for PG-deficient  
372 spheres. However, LPS core mutants exhibited post-antibiotic exposure  
373 phenotypes that cannot easily be explained by cell wall precursor depletion  
374 alone. The absence of the clear demarcation between the inner and outer  
375 membrane in the LPS core (*vc0225* mutant) deficient spheres suggests that IM  
376 material (IM phospholipids and associated proteins) may be present in the OM.  
377 More broadly, our findings demonstrate the importance of LPS integrity for *V.*  
378 *cholerae* survival of cell wall damage; it is likely that LPS structure/strength  
379 modulates susceptibility to beta lactams in other bacteria as well, as has been  
380 suggested in *E. coli* (35).

381 As expected, we also found cell wall synthesis and recycling factors to be  
382 required for sphere recovery. The prominent role of PBP1a, rather than its  
383 paralog PBP1b, in the recovery process supports our previous data showing that  
384 PBP1a is the principle aPBP in *V. cholerae* (23, 36) and is consistent with  
385 observations in lysozyme-treated, spherical *E. coli*, where that organism's

386 principal aPBP (PBP1B) is required for recovery (32). Intriguingly, PBP1a  
387 localized as a concentrated ring around the outgrowth area. Moenomycin, an  
388 aPBP TG inhibitor, abrogated PBP1a's capacity to localize to the outgrowth area  
389 as well as sphere recovery, revealing the essentiality of aPBP enzymatic activity  
390 for the recovery process. In contrast, MreB, and by extension likely the  
391 associated Rod system appeared to play a minor role during the early stages of  
392 recovery (though MreB was ultimately necessary for full sphere-to-rod  
393 conversion). We do not know the exact structure of possible remnant PG in  
394 spheres; however, our results suggest that aPBPs are more efficient than the  
395 Rod system at starting PG synthesis in the absence of a rod-shaped scaffold.  
396 Recent data suggest that MreB determines the directionality of Rod-mediated PG  
397 synthesis through its axial, membrane-curvature-induced orientation in the cell  
398 (37). Our data are in line with such a model, as axial localization cues are lost in  
399 a sphere. Thus, the Rod system might rely on the aPBPs to first mediate some  
400 degree of sphere constriction, inducing heterogeneity in membrane curvature  
401 that would then enable ordered, Rod-mediated PG deposition resulting in cell  
402 elongation.

403         In summary, we provide here an analysis of factors required for post-  
404 antibiotic recovery in *V. cholerae* treated with a beta lactam antibiotic. Our results  
405 directly demonstrate a role for OM integrity in beta lactam tolerance and establish  
406 a differential role for aPBPs and the Rod system for post-antibiotic recovery. The  
407 factors identified here could serve as novel targets for antibiotic adjuvants that

408 increase the efficacy of beta lactam antibiotics and other inhibitors of cell wall  
409 synthesis towards Gram-negative pathogens.

410

## 411 **Acknowledgements**

412 We thank Hongbaek Cho and Thomas Bernhardt for the msfGFP template. Carol  
413 Gross is acknowledged for her gift of the anti RpoE antibody. Research in the  
414 Waldor lab is supported by the Howard Hughes Medical Institute and NIH (2R01-  
415 AI-042347-23). Research in the VanNieuwenhze lab is supported by NIH grant  
416 GM113172.

417

## 418 **Materials and Methods**

### 419 **Media, chemicals and growth conditions**

420 All growth experiments were conducted either in Luria Bertani Broth (LB) or M9  
421 minimal medium supplemented with glucose (0.2 %). Antibiotics were purchased  
422 from the following suppliers: Moenomycin (Santa Cruz), MP265 (Santa Cruz)  
423 Penicillin G (Fisher), streptomycin (Santa Cruz). Unless otherwise noted, all  
424 experiments were conducted in three biological replicates (i.e. experiments  
425 conducted on different days). For each experiment, two independent overnight  
426 cultures were used; where possible (i.e. for mutants constructed in this study)  
427 these cultures were inoculated from two independently isolated clones.

428

429

430

431 **Molecular techniques/strain construction**

432 For molecular cloning purposes, PCR was conducted using Q5 high fidelity  
433 polymerase (NEB). For diagnostic PCRs, OneTaq mastermix (NEB) was used  
434 instead. All cloned constructs were verified using sequencing. All plasmid cloning  
435 was done using Isothermal Assembly (ITA) (38). Oligos are summarized in **Table**  
436 **S1** and strains in **Table S2**. Unless otherwise noted, all strains were constructed  
437 in the El Tor N16961 background.

438 Unless otherwise noted, mutants were constructed as previously  
439 described using the suicide plasmid pCVD442 (39) and homologous  
440 recombination to replace genes with the sequence  
441 TAATGCGGCCGCACTCGAGTAATAATGATGA. Briefly, the *E. coli* donor strain  
442 Sm10 carrying a pCVD-based deletion plasmid was mixed 1:1 with the *V.*  
443 *cholerae* recipient on an LB plate and incubated for at least 2h at 37 °C. The cell  
444 mixture was then streaked out on a plate containing carbenicillin (100 µg/ml) and  
445 streptomycin (200 µg/ml) to select against the donor strain and for recipients that  
446 have integrated the deletion plasmid. To counterselect against pCVD, a single  
447 colony was then streaked out on sucrose agar (15 g/L agar, 10 g/L tryptone, 5  
448 g/L yeast extract, filter-sterilized sucrose added after autoclaving to 10 % final  
449 concentration) + streptomycin. Plates were incubated at ambient temperature for  
450 1 day and then transferred to 30 °C, followed by additional incubation for 1 or 2  
451 days. Successful mutants were verified via colony PCR using primers flanking  
452 the gene of interest.

453 For the *vc0225* disruption, *sacB*-based counterselection did not work due to the  
454 inability of LPS core mutants to grow on sucrose agar. We therefore used a *kanR*  
455 (conferring kanamycin resistance) variant of the single crossover suicide vector  
456 pGP704 (40) to create insertion disruption mutants. To this end, a 400bp internal  
457 fragment (nucleotide position 27 – 427) of *vc0225* or a 461 bp internal fragment  
458 (nucleotide position 93 – 554) of *vc0212* was cloned into pGPkan and transferred  
459 into recipient *V. cholerae* using the di-amino pimelic acid (DAP)-auxotrophic *E.*  
460 *coli* donor strain MFD lambda pir (41). Insertion mutants were selected on plates  
461 containing streptomycin (200 µg/ml) and kanamycin (50 µg/ml).  
462 Procedures for the construction of other knockout plasmids and strains was as  
463 follows:

464

#### 465 *Pbp1a::pbp1amcherry*

466 Upstream and downstream regions were amplified using primers TDP 1362/1434  
467 and TDP 1435/232 respectively and fused with mCherry (amplified using primers  
468 1436/1437) and Xba1-digested pCVD442 using ITA. These primers insert the  
469 linker sequence gacatcctcgagctc between PBP1a (no stop codon) and mCherry.

#### 470 $\Delta alm \Delta eptA$

471 For the  $\Delta alm$  plasmid, upstream and downstream homologies were amplified  
472 using primers 519/520 and 521/522 respectively. For  $\Delta eptA$ , upstream and  
473 downstream homology regions were amplified using primers 539/540 and  
474 541/542.

475

## 476 **TnSeq**

477 TnSeq was conducted as described before (42-44); briefly, cultures were  
478 subjected to transposon (mariner) mutagenesis in duplicate. In the resulting  
479 libraries (~200,000 colonies/replicate), whole population transposon-chromosome  
480 junctions were sequenced (PRE sample, see below); the libraries were then  
481 frozen down in 30 % glycerol (-80°C). For the experiment, libraries were grown to  
482 an OD600 ~0.5 then exposed to penicillin G (100 µg/ml, 10 x MIC) for 4 h and  
483 sequenced again (POST sample), followed by washing to remove the antibiotic  
484 and outgrowth overnight; after which the libraries were sequenced again  
485 (outgrowth, OG sample). Sequencing was performed as follows. Pelleted  
486 libraries were lysed and DNA fragmented using NEB fragmentase, followed by  
487 blunting (Blunting enzyme mix, NEB), A-tailing and ligation of specific adaptors.  
488 Transposon-DNA junctions were then PCR amplified using transposon- and  
489 adaptor-specific primers. The libraries were then sequenced on an Illumina  
490 MiSeq. Data analysis was essentially conducted as described (42-44), however,  
491 to avoid false negatives that did not pass our stringent cut-off, we also used a  
492 candidate-based approach (based on known genetic interactions between cell  
493 envelope functions) to visually inspect the TnSeq dataset in the genome browser  
494 Artemis (this approach yielded e.g. WigKR and RpoE).

495

## 496 **Recovery on agarose pads**

497 For recovery timelapses, overnight cultures were diluted 100-fold into fresh M9  
498 MM, then grown until OD600 = 0.3 (3.5 h) at 37 °C shaking. Antibiotic was then

499 added, followed by incubation for another 3h. Cells were then washed twice in  
500 antibiotic-free medium and applied to agarose patches (0.8 % agarose in M9)  
501 and imaged every 5 min on a Leica DMI8 inverted microscope with incubated (30  
502 °C) stage. For fluorescent readings, exposure time was 500 ms (mCherry), 300  
503 ms (msfGFP) or 1000 ms (HADA).

504

### 505 **Recovery in liquid medium**

506 Overnight cultures were diluted 100fold into fresh M9 MM, then grown until  
507 OD600 = 0.3 (3.5 h) at 37 °C shaking. Antibiotic was then added, followed by  
508 incubation for another 3h. Cells were then washed twice in antibiotic-free medium  
509 and diluted 10fold into same containing 100 µM HADA. Cells were withdrawn at  
510 the indicated time points, washed once with M9 and imaged as detailed above.

511

512

### 513 **Figure legends**

514 **Figure 1. Recovery of *V. cholerae* rod morphology on agarose pads. A)**

515 Sphere anatomy after 3 h of treatment with PenG. OM, outer membrane, IM,  
516 inner membrane, C, cytoplasm, P, periplasm. Cellular compartments as  
517 determined in (5) using fluorescent protein fusions with known localization  
518 patterns. Scale bar = 1 µm B) Representative timelapse images of PenG-  
519 generated spheres after removal of the antibiotic on an agarose pad.

520

521 **Figure 2. Sphere recovery in liquid medium.** Cells were grown to a density of  
522  $\sim 2 \times 10^8$  cfu/ml (T0) in minimal medium, exposed to penicillin G ( $100 \mu\text{g ml}^{-1}$ ,  
523 10x MIC) for 3 h (T3), then washed twice to remove the antibiotic and then  
524 imaged every hour. Yellow arrowheads show rod shaped cells and red  
525 arrowhead (plus enlarged window) shows sphere apparently budding of a rod.  
526

527 **Figure 3. PBP1a localizes to the leading edge of engulfment during sphere**  
528 **recovery.** Cells were exposed to PenG ( $\mu\text{g ml}^{-1}$ , 10 x MIC) for 3 h, followed by  
529 washing and application to agarose pads containing either no antibiotic, the  
530 aPBP inhibitor moenomycin or the MreB inhibitor MP265 (both at 10x MIC).  
531 Frames are 10 min apart, scale bar =  $5 \mu\text{m}$ . Arrows point to examples of ring-like  
532 localization of PBP1a in untreated spheres (yellow arrow) or those exposed to  
533 MP265 (green arrow).

534  
535 **Figure 4. Deposition of new cell wall material in recovering spheres is**  
536 **primarily mediated by aPBPs.** N16961  $\Delta\text{ldtA } \Delta\text{ldtB}$  cells were exposed to PenG  
537 ( $100 \mu\text{g ml}^{-1}$ , 10 x MIC) in M9 minimal medium for 3 h (T0 and T3), followed by  
538 washing and resuspension in fresh, pre-warmed M9 containing the fluorescent D-  
539 amino acid analog HADA as a cell wall label (4-12 h). Scale bar =  $5 \mu\text{m}$ . The  
540 MreB inhibitor MP265 was added at  $200 \mu\text{M}$  (10 x MIC) and the aPBP inhibitor  
541 moenomycin at  $10 \mu\text{g ml}^{-1}$  (10x MIC).  
542



543 **Figure 5. Identification of genes required for sphere recovery with TnSeq.**

544 **A)** Schematic of experimental design and volcano plots of change in relative  
545 abundance of insertion mutants between the two conditions (x axis) vs the  
546 concordance of independent insertion mutants within each gene (y axis, inverse  
547 p-value). The square denotes the cutoff criteria applied ( $>10$ -fold fitness defect,  
548 p-value  $<0.01$ ) for identification of genes contributing to sphere recovery. PRE vs  
549 POST is a comparison of insertion frequencies after/before antibiotic exposure;  
550 POST vs. OG between an outgrowth period and directly after antibiotic exposure  
551 (see Methods for details) **B)** Distribution of the main functional categories of gene  
552 insertions that confer a post-antibiotic fitness defect. Functional categories were  
553 assigned manually following annotation of individual proteins in the Kegg  
554 database (<http://www.genome.jp/kegg/>).

555

556 **Figure 6. An LPS core mutant is defective in sphere recovery and**

557 **organization. A)** Time-dependent viability experiment in the presence of PenG.  
558 Strains were exposed to PenG ( $100 \mu\text{g ml}^{-1}$ ,  $10\times$  MIC) at T0 and plated for  
559  $\text{cfu ml}^{-1}$  at the indicated times. **B)** Localization of Penicillin Binding Protein 1a  
560 (PBP1a) in PenG-treated wt (top) and mutant spheres (bottom). PBP1amCherry  
561 was expressed from its native, chromosomal locus. Scale bar =  $5 \mu\text{m}$  **C)**  
562 Recovery pattern in a PenG-treated PBP1amCherry *vc0225* mutant after  
563 exposure to and subsequent removal of PenG. Frames are 10 min apart.

564

565 **Figure 7. Outer membrane modifications are not required for sphere**  
566 **formation. A)** Sphere formation in wt and mutants defective in glycine (*alm*) and  
567 ethanolamine (*eptA*) modifications alone and in combination with defects in LPS  
568 core biosynthesis (*vc0225*) and lipid A acylation (*vc0212*). Scale bar = 5  $\mu\text{m}$  **B)**  
569 Time-dependent viability experiment as described in **Fig 4A**.

570

571 **Figure 8. Sigma E is induced in response to cell wall acting antibiotics and**  
572 **is required for beta lactam tolerance.**

573 **A)** Western Blot using anti-RpoE antiserum after exposure to penicillin G (PenG,  
574  $100 \mu\text{g ml}^{-1}$ , 10x MIC), phosphomycin (phospho,  $100 \mu\text{g ml}^{-1}$ , 3 x MIC) or D-  
575 cycloserine (D-cyc,  $100 \mu\text{g ml}^{-1}$ , 3 x MIC). **B)** Time-dependent viability of  
576 indicated strains after exposure to PenG ( $100 \mu\text{g ml}^{-1}$ , 10 x MIC). **C)**  
577 Pretreatment with PenG sensitizes cells to high molecular weight antibiotics.  
578 Cells were exposed to either vehicle (no pretreatment) or Penicillin G (PenG,  $100$   
579  $\mu\text{g ml}^{-1}$ ) for 3h, followed by plating on either LB, vancomycin (vanco,  $200 \mu\text{g ml}^{-1}$ ),  
580 or ramoplanin (ramo,  $100 \mu\text{g ml}^{-1}$  or  $500 \mu\text{g ml}^{-1}$ ).

581

582

583 **Figure S1.** Fluorescent protein fusion to PBP1a is functional. Overnight cultures  
584 of the indicated strains were plated on LB agar containing  $100 \mu\text{g ml}^{-1}$  cefsulodin,  
585 an inhibitor of PBP1B (23).

586

587 **Figure S2.** HADA staining in recovering spheres treated with inhibitors of aPBPs  
588 or the Rod system. Frames are taken from the experiment as shown in **Figure 4.**  
589 The pixel intensity range was set to 100 – 2000 in all images to illustrate the  
590 above background fluorescence in moenomycin-treated cells. Note that this  
591 results in overexposure of the untreated sample image.

592

593 **Figure S3. A)** TnSeq hits below the cutoff ( $\geq 10$ -fold fitness defect,  $p$ -val  $<$   
594 0.01). **B)** representative Artemis plots of the genes encoding Heptosyltransferase  
595 I (*vc0225*) and the Sigma E operon. POST results from analyses Post-antibiotic;  
596 OG results from analyses after post-antibiotic outgrowth.

597

598 **Figure S4.** Silver stain of *V. cholerae* isolated outer membranes, comparing wild  
599 type and the *vc0225* mutant. The red arrow points to high molecular weight  
600 structures, likely core + O-antigen, M, marker.

601

602 **Figure S5.** Polymyxin sensitivity of *alm* and *eptA* mutants. Overnight cultures of  
603 the indicated strains were plated on LB agar containing Polymyxin B at  $10 \mu\text{g ml}^{-1}$   
604 and IPTG ( $100 \mu\text{M}$ ) where applicable.

605

606 **Movie S1.** Representative timelapse of wt *V. cholerae* sphere recovery. Cells  
607 were exposed to PenG in M9 MM + glucose, followed by washing and transfer to  
608 an agarose pad containing M9 MM + glucose. Frames are 5 min apart.

609

- 610 1. Meylan S, Andrews IW, Collins JJ. 2018. Targeting Antibiotic Tolerance,  
611 Pathogen by Pathogen. *Cell* 172:1228-1238.
- 612 2. Conlon BP, Rowe SE, Lewis K. 2015. Persister cells in biofilm associated  
613 infections. *Adv Exp Med Biol* 831:1-9.
- 614 3. Sharma B, Brown AV, Matluck NE, Hu LT, Lewis K. 2015. *Borrelia*  
615 *burgdorferi*, the Causative Agent of Lyme Disease, Forms Drug-Tolerant  
616 Persister Cells. *Antimicrob Agents Chemother* 59:4616-24.
- 617 4. Lewis K. 2010. Persister cells. *Annu Rev Microbiol* 64:357-72.
- 618 5. Dorr T, Davis BM, Waldor MK. 2015. Endopeptidase-mediated beta  
619 lactam tolerance. *PLoS Pathog* 11:e1004850.
- 620 6. Held K, Gasper J, Morgan S, Siehnel R, Singh P, Manoil C. 2018.  
621 Determinants of Extreme beta-Lactam Tolerance in the *Burkholderia*  
622 *pseudomallei* Complex. *Antimicrob Agents Chemother* 62.
- 623 7. Monahan LG, Turnbull L, Osvath SR, Birch D, Charles IG, Whitchurch CB.  
624 2014. Rapid conversion of *Pseudomonas aeruginosa* to a spherical cell  
625 morphotype facilitates tolerance to carbapenems and penicillins but  
626 increases susceptibility to antimicrobial peptides. *Antimicrob Agents*  
627 *Chemother* 58:1956-62.
- 628 8. Errington J, Mickiewicz K, Kawai Y, Wu LJ. 2016. L-form bacteria, chronic  
629 diseases and the origins of life. *Philos Trans R Soc Lond B Biol Sci* 371.
- 630 9. Dorr T, Alvarez L, Delgado F, Davis BM, Cava F, Waldor MK. 2016. A cell  
631 wall damage response mediated by a sensor kinase/response regulator  
632 pair enables beta-lactam tolerance. *Proc Natl Acad Sci U S A* 113:404-9.
- 633 10. Cheng AT, Ottemann KM, Yildiz FH. 2015. *Vibrio cholerae* Response  
634 Regulator VxrB Controls Colonization and Regulates the Type VI  
635 Secretion System. *PLoS Pathog* 11:e1004933.
- 636 11. Teschler JK, Cheng AT, Yildiz FH. 2017. The Two-Component Signal  
637 Transduction System VxrAB Positively Regulates *Vibrio cholerae* Biofilm  
638 Formation. *J Bacteriol* 199.
- 639 12. Zhao H, Patel V, Helmann JD, Dorr T. 2017. Don't let sleeping dogmas lie:  
640 new views of peptidoglycan synthesis and its regulation. *Mol Microbiol*  
641 106:847-860.
- 642 13. Typas A, Banzhaf M, van den Berg van Saparoea B, Verheul J, Biboy J,  
643 Nichols RJ, Zietek M, Beilharz K, Kannenberg K, von Rechenberg M,  
644 Breukink E, den Blaauwen T, Gross CA, Vollmer W. 2010. Regulation of  
645 peptidoglycan synthesis by outer-membrane proteins. *Cell* 143:1097-109.
- 646 14. Paradis-Bleau C, Markovski M, Uehara T, Lupoli TJ, Walker S, Kahne DE,  
647 Bernhardt TG. 2010. Lipoprotein cofactors located in the outer membrane  
648 activate bacterial cell wall polymerases. *Cell* 143:1110-20.
- 649 15. Cho H, Wivagg CN, Kapoor M, Barry Z, Rohs PD, Suh H, Marto JA,  
650 Garner EC, Bernhardt TG. 2016. Bacterial cell wall biogenesis is mediated  
651 by SEDS and PBP polymerase families functioning semi-autonomously.  
652 *Nat Microbiol* doi:10.1038/nmicrobiol.2016.172:16172.
- 653 16. Garner EC, Bernard R, Wang W, Zhuang X, Rudner DZ, Mitchison T.  
654 2011. Coupled, circumferential motions of the cell wall synthesis  
655 machinery and MreB filaments in *B. subtilis*. *Science* 333:222-5.

- 656 17. Dominguez-Escobar J, Chastanet A, Crevenna AH, Fromion V, Wedlich-  
657 Soldner R, Carballido-Lopez R. 2011. Processive movement of MreB-  
658 associated cell wall biosynthetic complexes in bacteria. *Science* 333:225-  
659 8.
- 660 18. van Teeffelen S, Wang S, Furchtgott L, Huang KC, Wingreen NS,  
661 Shaevitz JW, Gitai Z. 2011. The bacterial actin MreB rotates, and rotation  
662 depends on cell-wall assembly. *Proc Natl Acad Sci U S A* 108:15822-7.
- 663 19. Billings G, Ouzounov N, Ursell T, Desmarais SM, Shaevitz J, Gitai Z,  
664 Huang KC. 2014. De novo morphogenesis in L-forms via geometric  
665 control of cell growth. *Mol Microbiol* 93:883-96.
- 666 20. Ranjit DK, Young KD. 2013. The Rcs stress response and accessory  
667 envelope proteins are required for de novo generation of cell shape in  
668 *Escherichia coli*. *J Bacteriol* 195:2452-62.
- 669 21. Morgenstein RM, Bratton BP, Nguyen JP, Ouzounov N, Shaevitz JW,  
670 Gitai Z. 2015. RodZ links MreB to cell wall synthesis to mediate MreB  
671 rotation and robust morphogenesis. *Proc Natl Acad Sci U S A* 112:12510-  
672 5.
- 673 22. Lee TK, Meng K, Shi H, Huang KC. 2016. Single-molecule imaging  
674 reveals modulation of cell wall synthesis dynamics in live bacterial cells.  
675 *Nat Commun* 7:13170.
- 676 23. Dorr T, Moll A, Chao MC, Cava F, Lam H, Davis BM, Waldor MK. 2014.  
677 Differential requirement for PBP1a and PBP1b in in vivo and in vitro  
678 fitness of *Vibrio cholerae*. *Infect Immun* 82:2115-24.
- 679 24. Takacs CN, Poggio S, Charbon G, Pucheault M, Vollmer W, Jacobs-  
680 Wagner C. 2010. MreB drives de novo rod morphogenesis in *Caulobacter*  
681 *crescentus* via remodeling of the cell wall. *J Bacteriol* 192:1671-84.
- 682 25. Cava F, de Pedro MA, Lam H, Davis BM, Waldor MK. 2011. Distinct  
683 pathways for modification of the bacterial cell wall by non-canonical D-  
684 amino acids. *EMBO J* 30:3442-53.
- 685 26. Herrera CM, Henderson JC, Crofts AA, Trent MS. 2017. Novel  
686 coordination of lipopolysaccharide modifications in *Vibrio cholerae*  
687 promotes CAMP resistance. *Mol Microbiol* 106:582-596.
- 688 27. Hankins JV, Madsen JA, Giles DK, Brodbelt JS, Trent MS. 2012. Amino  
689 acid addition to *Vibrio cholerae* LPS establishes a link between surface  
690 remodeling in gram-positive and gram-negative bacteria. *Proc Natl Acad*  
691 *Sci U S A* 109:8722-7.
- 692 28. Hankins JV, Madsen JA, Giles DK, Childers BM, Klose KE, Brodbelt JS,  
693 Trent MS. 2011. Elucidation of a novel *Vibrio cholerae* lipid A secondary  
694 hydroxy-acyltransferase and its role in innate immune recognition. *Mol*  
695 *Microbiol* 81:1313-29.
- 696 29. Mathur J, Davis BM, Waldor MK. 2007. Antimicrobial peptides activate the  
697 *Vibrio cholerae* sigmaE regulon through an OmpU-dependent signalling  
698 pathway. *Mol Microbiol* 63:848-58.
- 699 30. Davis BM, Waldor MK. 2009. High-throughput sequencing reveals  
700 suppressors of *Vibrio cholerae* rpoE mutations: one fewer porin is enough.  
701 *Nucleic Acids Res* 37:5757-67.

- 702 31. Levin-Reisman I, Ronin I, Gefen O, Braniss I, Shores N, Balaban NQ.  
703 2017. Antibiotic tolerance facilitates the evolution of resistance. *Science*  
704 355:826-830.
- 705 32. Ranjit DK, Jorgenson MA, Young KD. 2017. PBP1B Glycosyltransferase  
706 and Transpeptidase Activities Play Different Essential Roles during the De  
707 Novo Regeneration of Rod Morphology in *Escherichia coli*. *J Bacteriol*  
708 199.
- 709 33. Malinverni JC, Silhavy TJ. 2009. An ABC transport system that maintains  
710 lipid asymmetry in the gram-negative outer membrane. *Proc Natl Acad Sci*  
711 *U S A* 106:8009-14.
- 712 34. Jorgenson MA, Young KD. 2016. Interrupting Biosynthesis of O Antigen or  
713 the Lipopolysaccharide Core Produces Morphological Defects in  
714 *Escherichia coli* by Sequestering Undecaprenyl Phosphate. *J Bacteriol*  
715 198:3070-3079.
- 716 35. Yao Z, Kahne D, Kishony R. 2012. Distinct single-cell morphological  
717 dynamics under beta-lactam antibiotics. *Mol Cell* 48:705-12.
- 718 36. Dorr T, Lam H, Alvarez L, Cava F, Davis BM, Waldor MK. 2014. A novel  
719 peptidoglycan binding protein crucial for PBP1A-mediated cell wall  
720 biogenesis in *Vibrio cholerae*. *PLoS Genet* 10:e1004433.
- 721 37. Hussain S, Wivagg CN, Szwedziak P, Wong F, Schaefer K, Izore T,  
722 Renner LD, Holmes MJ, Sun Y, Bisson-Filho AW, Walker S, Amir A, Lowe  
723 J, Garner EC. 2018. MreB filaments align along greatest principal  
724 membrane curvature to orient cell wall synthesis. *Elife* 7.
- 725 38. Gibson DG, Young L, Chuang RY, Venter JC, Hutchison CA, 3rd, Smith  
726 HO. 2009. Enzymatic assembly of DNA molecules up to several hundred  
727 kilobases. *Nat Methods* 6:343-5.
- 728 39. Donnenberg MS, Kaper JB. 1991. Construction of an *eae* deletion mutant  
729 of enteropathogenic *Escherichia coli* by using a positive-selection suicide  
730 vector. *Infect Immun* 59:4310-7.
- 731 40. Miller VL, Mekalanos JJ. 1988. A novel suicide vector and its use in  
732 construction of insertion mutations: osmoregulation of outer membrane  
733 proteins and virulence determinants in *Vibrio cholerae* requires *toxR*. *J*  
734 *Bacteriol* 170:2575-83.
- 735 41. Ferrieres L, Hemery G, Nham T, Guerout AM, Mazel D, Beloin C, Ghigo  
736 JM. 2010. Silent mischief: bacteriophage Mu insertions contaminate  
737 products of *Escherichia coli* random mutagenesis performed using suicidal  
738 transposon delivery plasmids mobilized by broad-host-range RP4  
739 conjugative machinery. *J Bacteriol* 192:6418-27.
- 740 42. Yamaichi Y, Dorr T. 2017. Transposon Insertion Site Sequencing for  
741 Synthetic Lethal Screening. *Methods Mol Biol* 1624:39-49.
- 742 43. Pritchard JR, Chao MC, Abel S, Davis BM, Baranowski C, Zhang YJ,  
743 Rubin EJ, Waldor MK. 2014. ARTIST: high-resolution genome-wide  
744 assessment of fitness using transposon-insertion sequencing. *PLoS*  
745 *Genet* 10:e1004782.

- 746 44. Chao MC, Abel S, Davis BM, Waldor MK. 2016. The design and analysis  
747 of transposon insertion sequencing experiments. *Nat Rev Microbiol*  
748 14:119-28.  
749

A

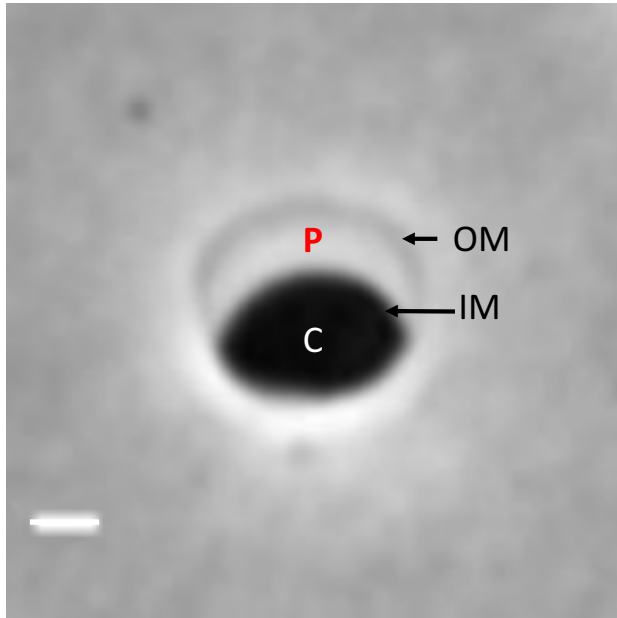

B

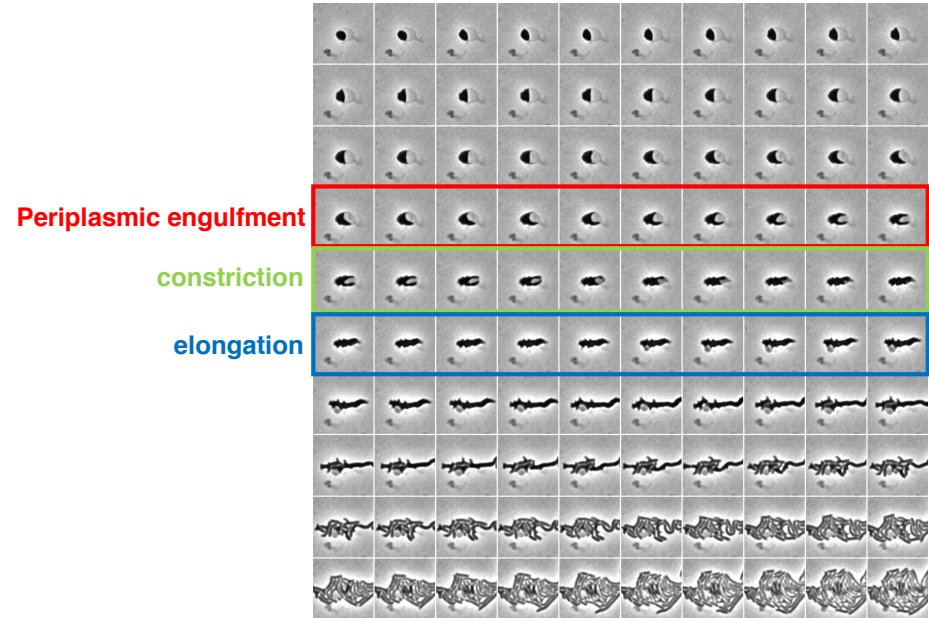



washed

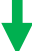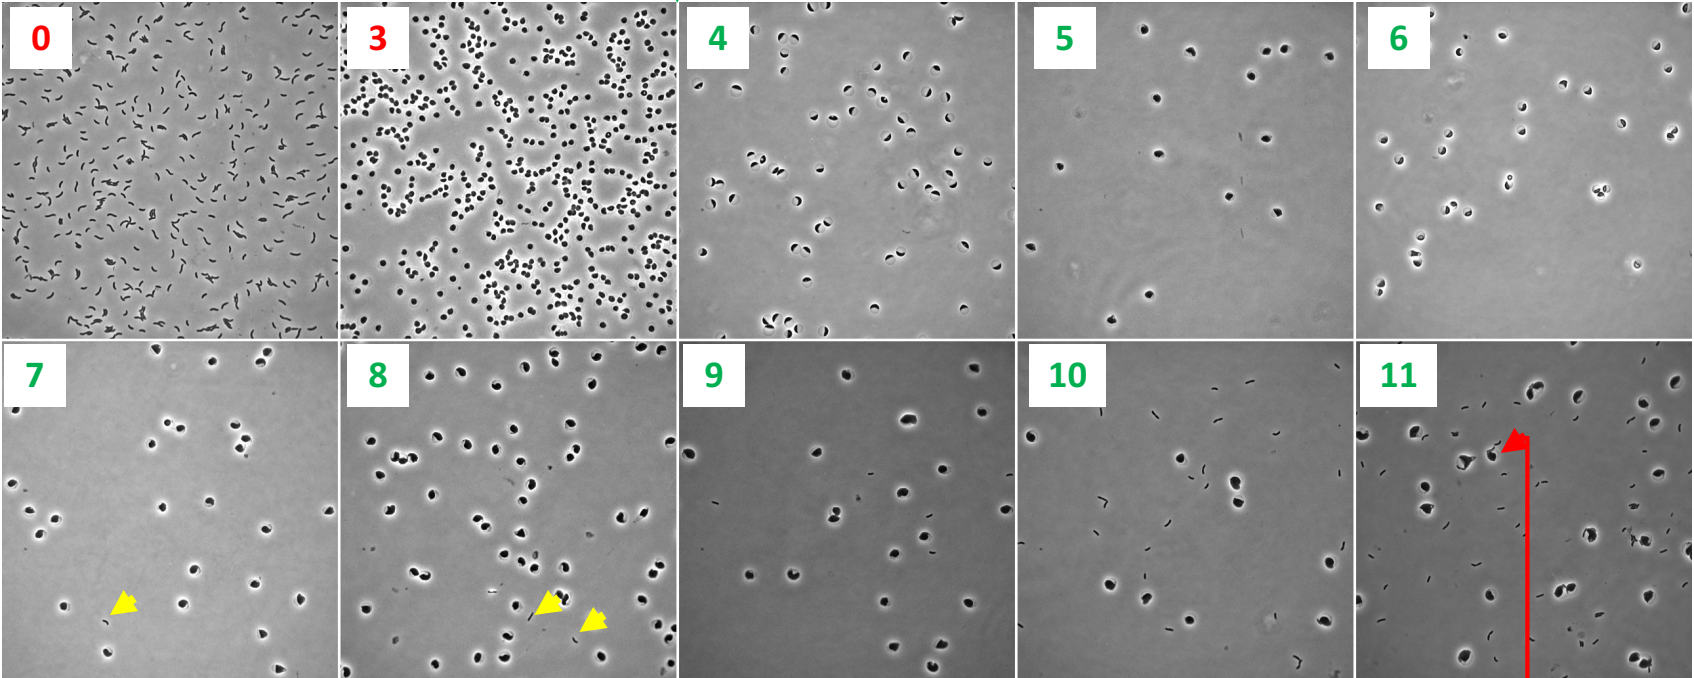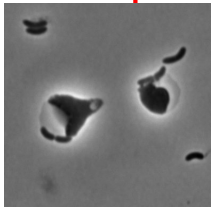

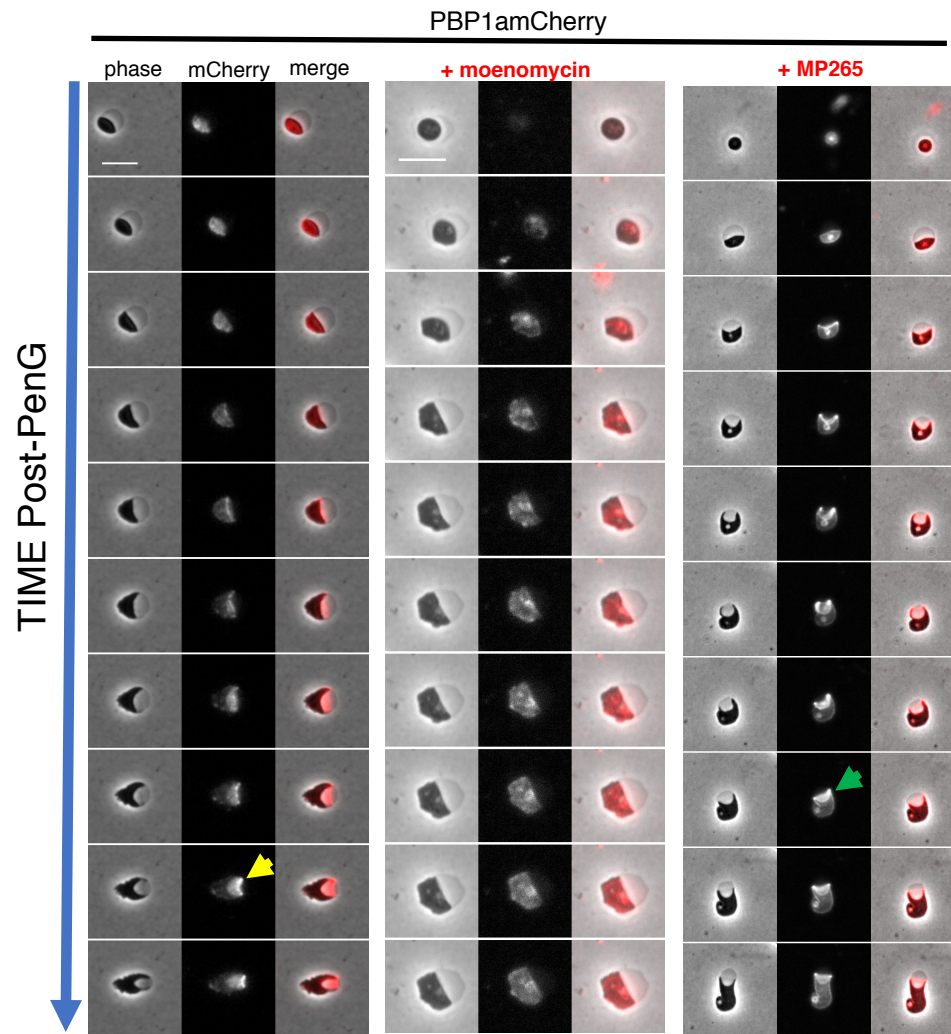

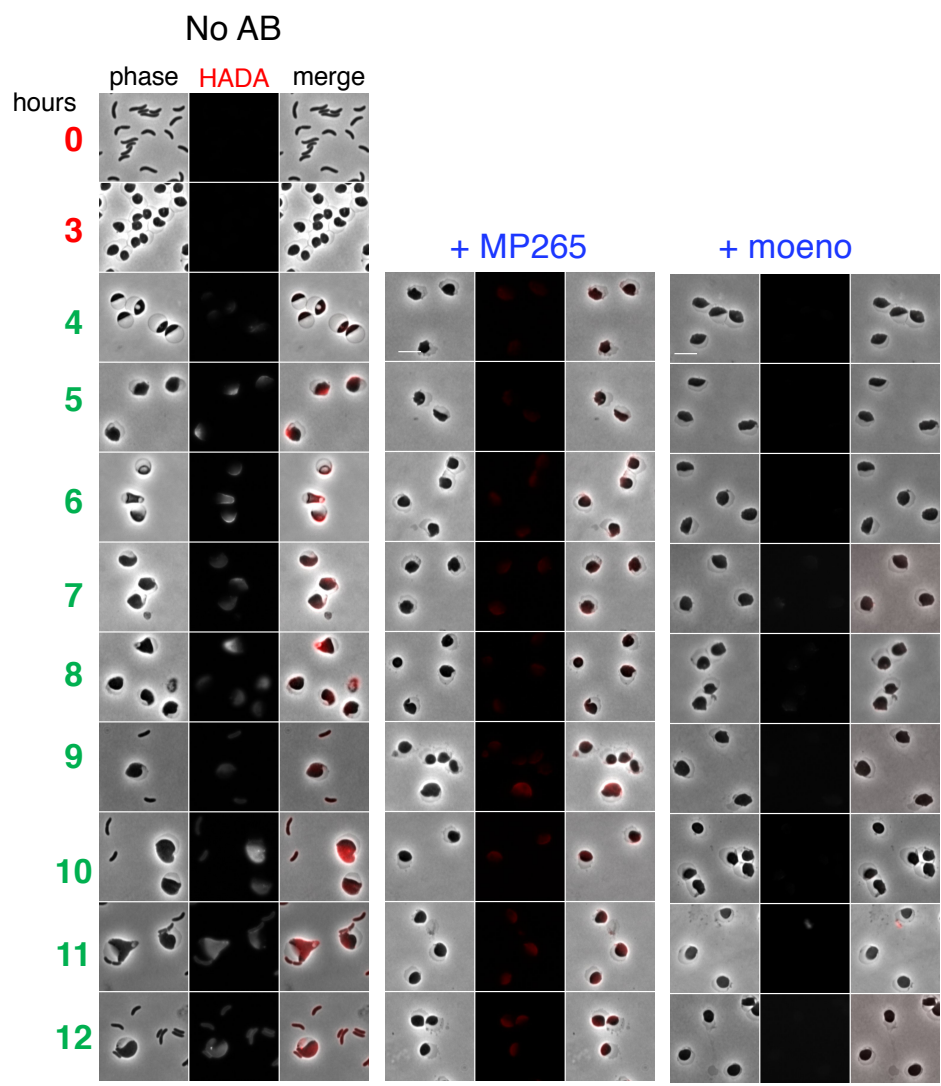

**A**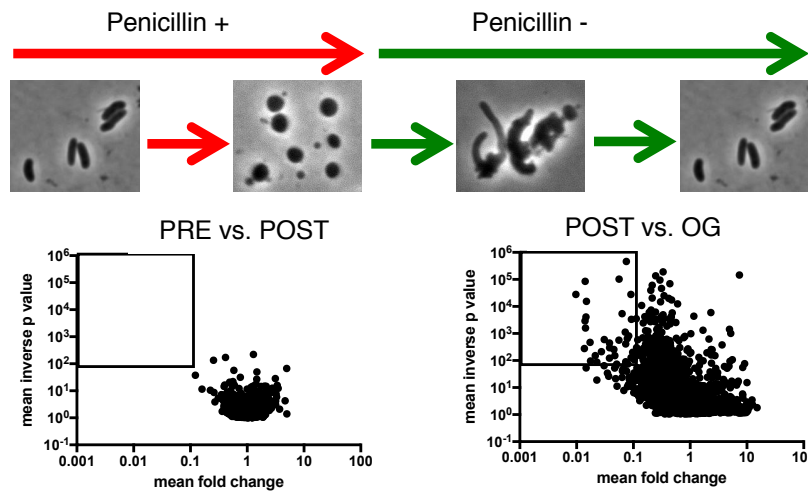**B**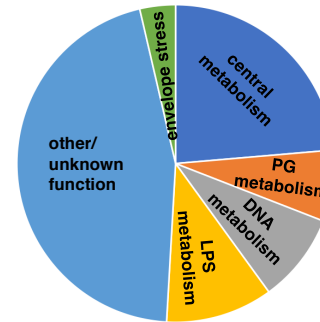

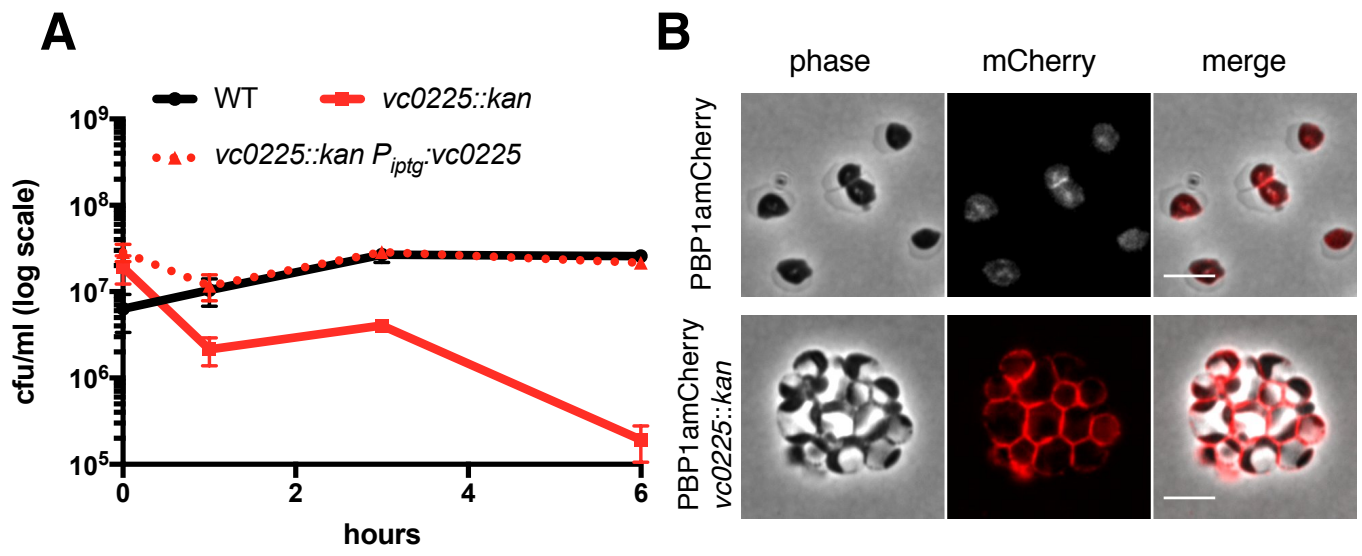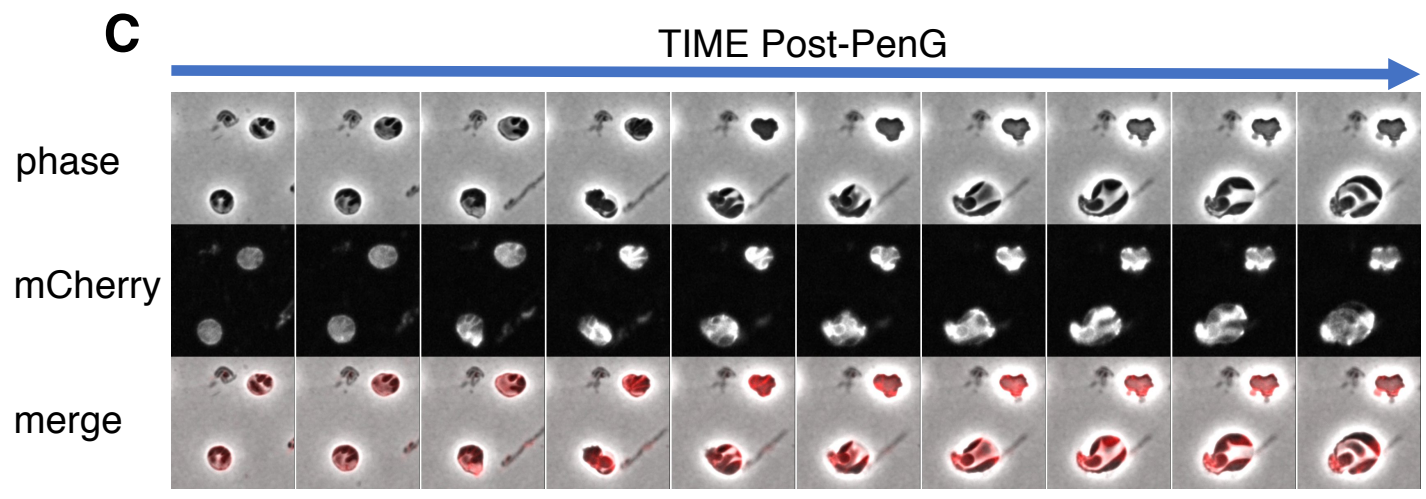

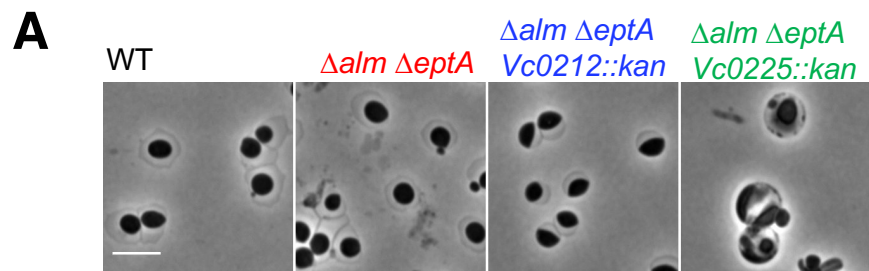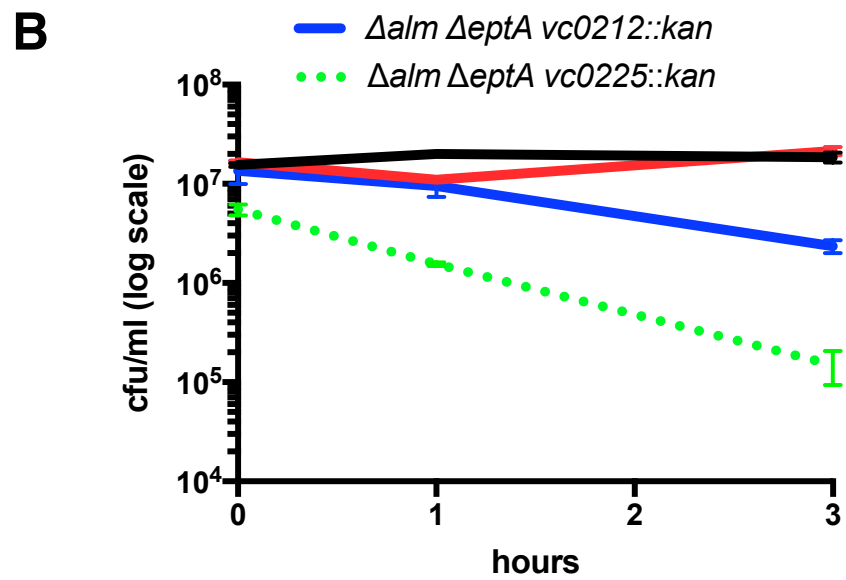

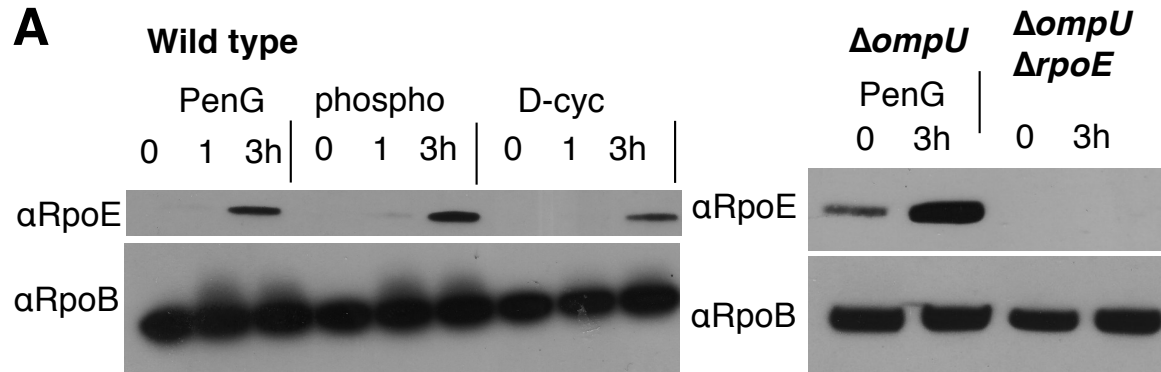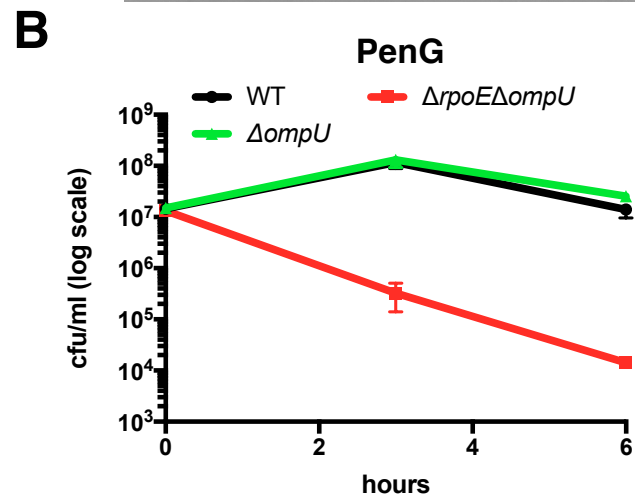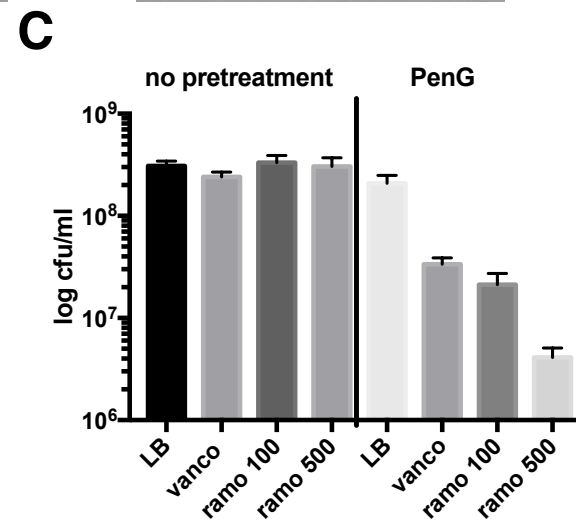

LB

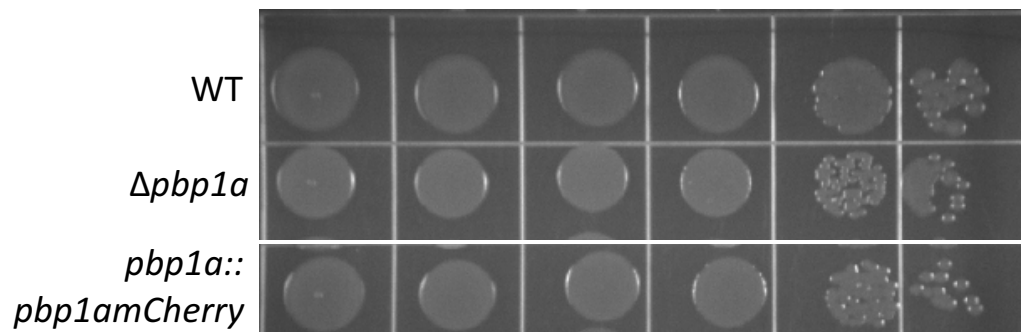

100  $\mu$ g/ml cefsulodin

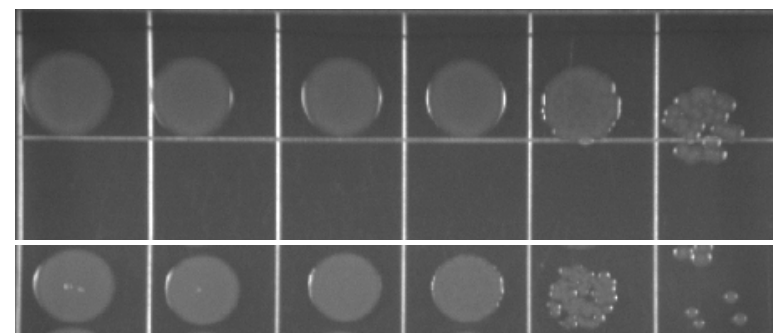



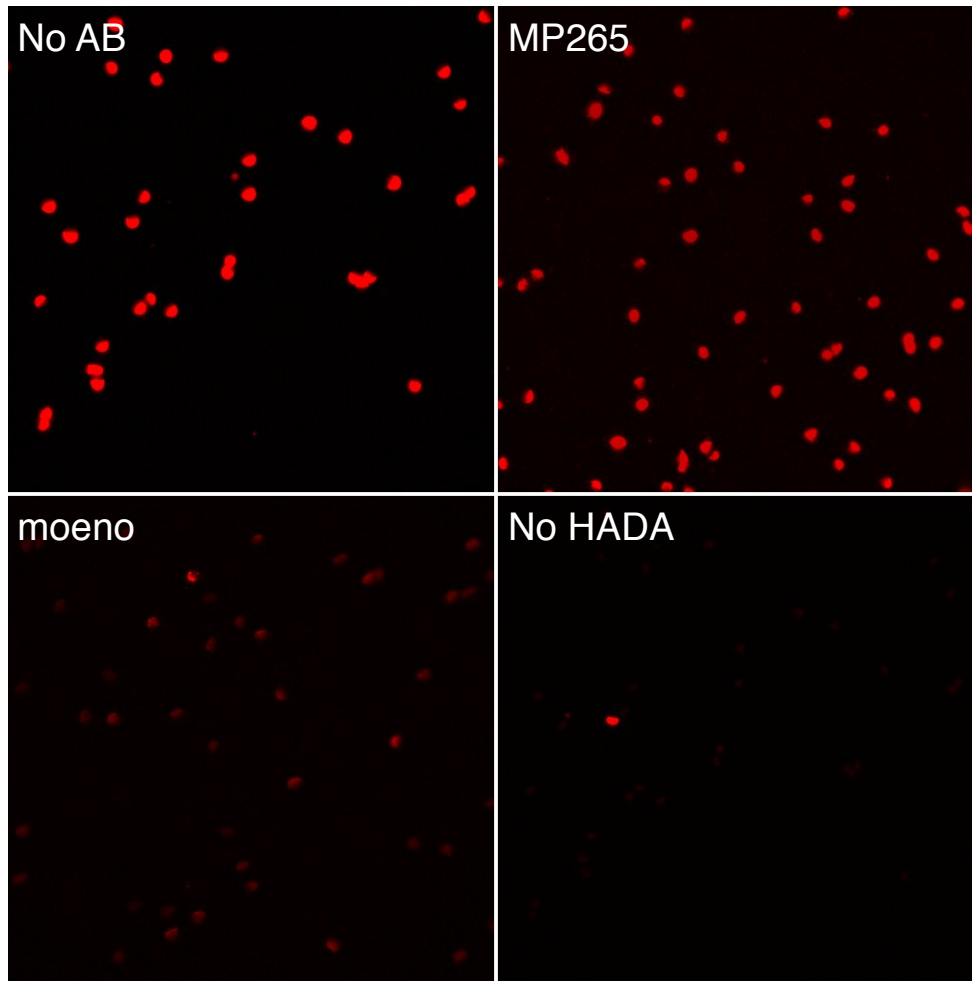

| gene name | annotation                                                      | putative role                   | fold change |
|-----------|-----------------------------------------------------------------|---------------------------------|-------------|
| VC_2270   | riboflavin synthase subunit alpha                               | Riboflavin biosynthesis         | 257         |
| VC_2271   | riboflavin-specific deaminase                                   | Riboflavin biosynthesis         | 139         |
| VC_0724   | phosphate ABC transporter permease                              | Phosphate regulation            | 121         |
| VC_1716   | condensin subunit F                                             | Chromosome condensation         | 109         |
| VC_2153   | D,D-carboxypeptidase-like protein                               | peptidoglycan metabolism        | 109         |
| VC_1714   | cell division protein MukB                                      | Chromosome condensation         | 90          |
| VC_0212   | lipid A biosynthesis (KDO)2-(lauroyl)-lipid IVA acyltransferase | lipopolysaccharide metabolism   | 89          |
| VC_1263   | GTP cyclohydrolase II/ribA                                      | Riboflavin biosynthesis         | 86          |
| VC_2312   | murein transglycosylase A                                       | peptidoglycan metabolism        | 85          |
| VC_0374   | glucose-6-phosphate isomerase                                   | carbon metabolism               | 81          |
| VC_1894   | hypothetical protein VC1894/LpoB                                | peptidoglycan metabolism        | 77          |
| VC_1715   | condensin subunit E                                             | Chromosome condensation         | 57          |
| VC_0761   | hypothetical protein VC0761/yfgM                                | envelope stress response        | 48          |
| VC_0225   | lipopolysaccharide biosynthesis protein                         | lipopolysaccharide metabolism   | 40          |
| VC_0851   | small protein A/BamE                                            | outer membrane metabolism       | 40          |
| VC_2635   | penicillin-binding protein 1A                                   | peptidoglycan metabolism        | 39          |
| VC_0908   | D,D-heptose 1,7-bisphosphate phosphatase                        | capsule biosynthesis            | 38          |
| VC_2465   | periplasmic negative regulator of sigmaE                        | envelope stress response        | 36          |
| VC_0936   | polysaccharide export-like protein                              | capsule biosynthesis            | 35          |
| VC_0236   | ADP-heptose-LPS heptosyltransferase II                          | lipopolysaccharide metabolism   | 33          |
| VC_0289   | gluconate utilization system gnt-I transcriptional repressor    | carbon metabolism               | 33          |
| VC_A0647  | hypothetical protein VCA0647                                    | unknown                         | 29          |
| VC_0034   | thiol:disulfide interchange protein                             | unknown                         | 29          |
| VC_A0424  | hypothetical protein VCA0424/DUF3709                            | unknown                         | 28          |
| VC_2629   | shikimate kinase I                                              | amino acid biosynthesis         | 27          |
| VC_0370   | hypothetical protein VC0370/YdiY                                | salt-induced OM protein         | 26          |
| VC_1630   | ABC transporter ATP-binding protein/LolD                        | lipoprotein export              | 23          |
| VC_1021   | LuxO repressor protein                                          | quorum sensing                  | 23          |
| VC_0240   | ADP-L-glycero-D-manno-heptose-6-epimerase                       | lipopolysaccharide metabolism   | 21          |
| VC_0952   | hypothetical protein VC0952/rfsS                                | ribosome downregulation         | 19          |
| VC_A0804  | ATP-dependent RNA helicase DeaD                                 | RNA metabolism                  | 18          |
| VC_0237   | O-antigen ligase waaL                                           | lipopolysaccharide metabolism   | 18          |
| VC_1039   | asmA protein                                                    | outer membrane metabolism       | 18          |
| VC_0984   | cholera toxin transcriptional activator                         | pathogenesis                    | 17          |
| VC_0431   | arginine repressor ArgR                                         | amino acid biosynthesis         | 17          |
| VC_2322   | exonuclease V subunit gamma-RecC                                | DNA recombination and repair    | 16          |
| VC_A0448  | hypothetical protein VCA0448                                    | unknown                         | 15          |
| VC_0547   | aspartate kinase                                                | amino acid biosynthesis         | 15          |
| VC_2298   | lipoprotein                                                     | unknown                         | 15          |
| VC_1697   | Short-chain dehydrogenases/reductases                           | central metabolism              | 14          |
| VC_0377   | hypothetical protein VC0377/CheX                                | chemotaxis                      | 14          |
| VC_0346   | tRNA delta(2)-isopentenylpyrophosphate transferase              | tRNA modification               | 14          |
| VC_A0645  | hypothetical protein VCA0645                                    | unknown                         | 14          |
| VC_0378   | zinc uptake regulation protein                                  | metal homeostasis               | 13          |
| VC_0003   | tRNA modification GTPase TrmE                                   | tRNA modification               | 13          |
| VC_A0344  | hypothetical protein VCA0344                                    | unknown                         | 13          |
| VC_A0395  | hypothetical protein VCA0395                                    | unknown                         | 13          |
| VC_0632   | D-alanyl-D-alanine carboxypeptidase/endopeptidase               | peptidoglycan metabolism        | 11          |
| VC_1682   | peptide ABC transporter permease                                | antimicrobial peptide transport | 11          |
| VC_0665   | Fis family transcriptional regulator                            | exopolysaccharide synthesis     | 11          |
| VC_A0573  | DamX-like protein                                               | cell division                   | 11          |
| VC_0223   | ADP-heptose-LPS heptosyltransferase II                          | lipopolysaccharide metabolism   | 11          |
| VC_0727   | transcriptional regulator PhoU                                  | Phosphate regulation            | 10          |
| VC_2320   | exodeoxyribonuclease V/RecB                                     | DNA recombination and repair    | 10          |
| VC_A0405  | hypothetical protein VCA0405                                    | unknown                         | 10          |
| VC_1700   | intracellular septation protein A                               | unknown                         | 10          |

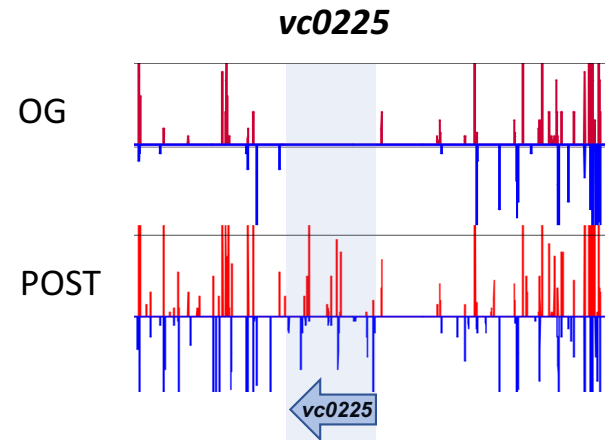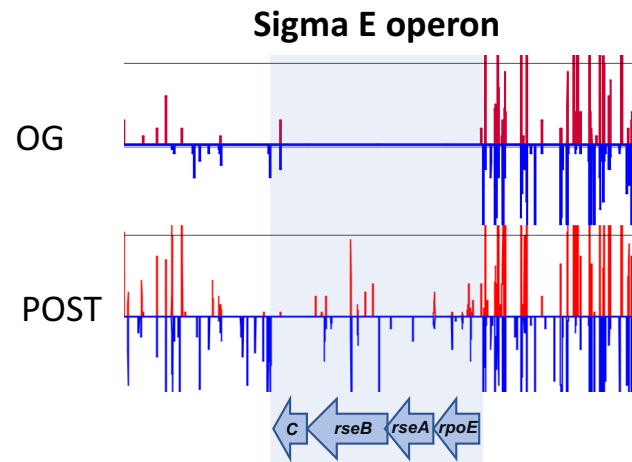

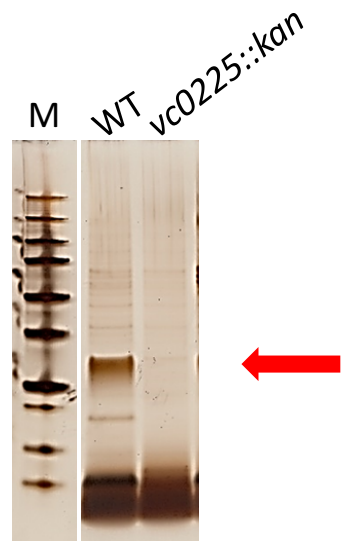

**A**

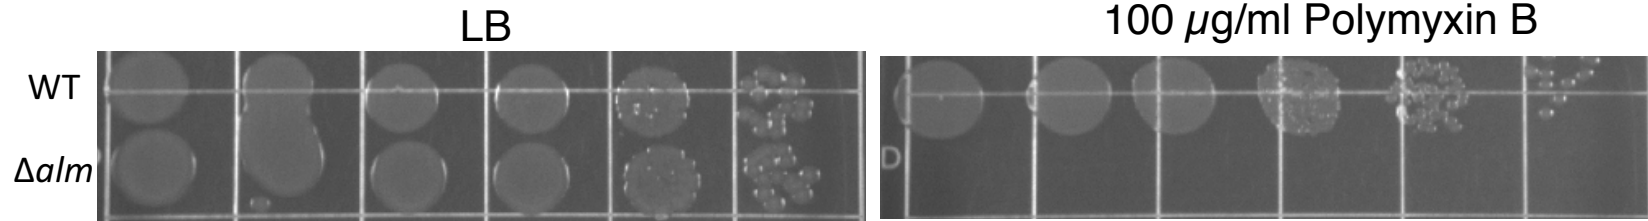

**B**

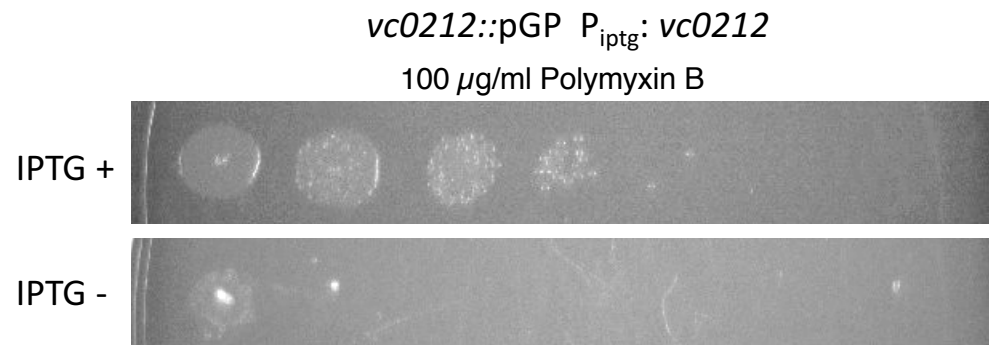

Source: http://biorxiv.org/content/10.1101/337949v1.full.pdf
